# Supplementary material for: Electrospun porous CuO–Ag nanofibers for quantitative sensitive SERS detection
Source: Royal Society of Chemistry journal article supplement (doi:10.1039/c2ce26591e), 2012-12-03
Supplement: c2ce26591e.pdf [file c2ce26591e.pdf]

## Supporting Information

### Pores CuO-Ag nanofibers as sensitive SERS sensor for quantitative detection of azobenzene

Wei Wang, Zhenyu Feng, Wei Jiang\* and Jinhua Zhan\*

School of Chemistry and Chemical Engineering, Shandong University,  
Jinan 250100, China.

E-mail: jhzhan@sdu.edu.cn; Tel: +86 531 88365017; Fax: +86 531 88564464.

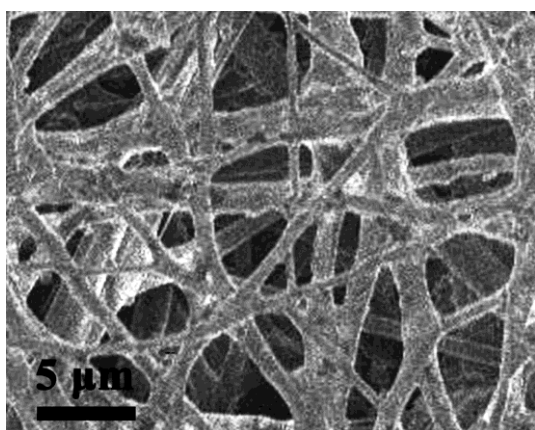

SI-1 SEM image of AgNO<sub>3</sub>/Cu(NO<sub>3</sub>)<sub>2</sub>/PVP precursor.

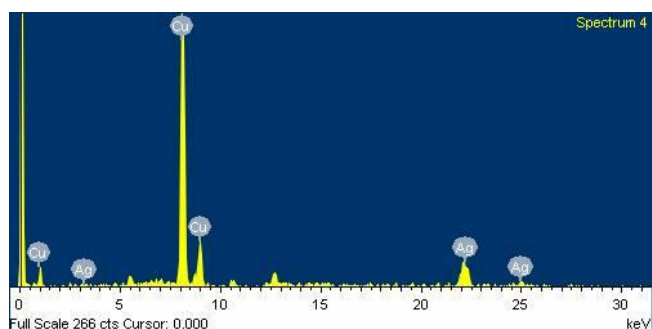

SI-2 EDS spectrum of the obtained product.

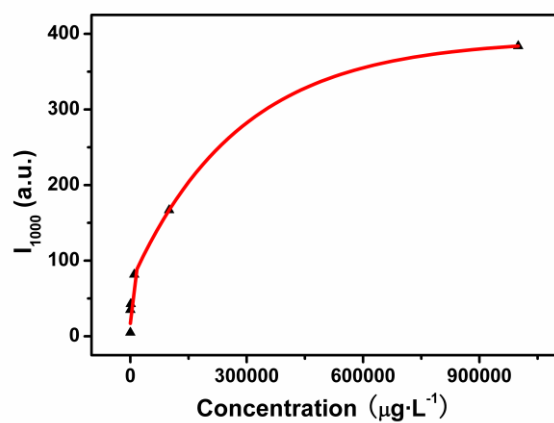

SI-3 The calibration curve for azobenzene.
